# Supplementary material for: Diabetes as a Determinant of Mortality in Cystic Fibrosis
Source: PubMed Central journal article supplement — Diabetes Care. 2009 Nov 16;33(2):311–6. doi: 10.2337/dc09-1215 (PMC2809272; doi:10.2337/dc09-1215), 2009-11-16
Supplement: supp_dc09-1215_dc09-1215_Online_Appendix.pdf [file supp_dc09-1215_dc09-1215_Online_Appendix.pdf]

## Online Appendix - Diabetes as a Determinant of Mortality in Cystic Fibrosis

**Online Appendix Table 1 Characteristics at baseline of 4,234 individuals with CF by mortality status and hazard ratio (HR) with 95% confidence interval for each risk factor**

| <i>Characteristic</i>                        | <i>Total<br/>(n=4,234)</i> | <i>Alive<br/>(n=3,909)</i> | <i>Died<br/>(n=325)</i> | <i>p-value*</i> | <i>HR (95%CI)<sup>†</sup></i> |
|----------------------------------------------|----------------------------|----------------------------|-------------------------|-----------------|-------------------------------|
| Age (years), median (IQR)                    | 16.0 (10.0 – 23.3)         | 15.1 (9.6 – 22.7)          | 21.9 (17.8 – 28.1)      | <0.001          | 1.06 (1.05 – 1.06)            |
| Females, No (%)                              | 1,953 (46.1)               | 1,784 (45.6)               | 169 (52.0)              | 0.027           | 1.24 (0.99 – 1.54)            |
| White ethnicity, No (%)                      | 4,105 (97.0)               | 3,785 (96.8)               | 320 (98.5)              | 0.100           | 1.35 (0.56 – 3.28)            |
| BMI, kg/m <sup>2</sup> (SD)                  | 19.3 (3.5)                 | 19.3 (3.5)                 | 18.8 (2.9)              | 0.010           | 0.97 (0.94 – 1.01)            |
| BMI z-score (SD)                             | -0.28 (1.20)               | -0.19 (1.13)               | -1.44 (1.41)            | <0.001          | 0.52 (0.49 – 0.56)            |
| FEV <sub>1</sub> % predicted (SD)            | 68.7 (28.7)                | 71.5 (27.5)                | 34.5 (19.7)             | <0.001          | 1.07 (1.06 – 1.07)            |
| FVC % predicted (SD)                         | 76.1 (31.3)                | 78.6 (30.7)                | 46.5 (22.2)             | <0.001          | 1.007 (1.006-1.007)           |
| Diabetes, No (%)                             | 592 (14.0)                 | 472 (12.1)                 | 120 (36.9)              | <0.001          | 4.04 (3.22 – 5.06)            |
| Pancreatic insufficiency, No (%)             | 3,897 (92.0)               | 3,583 (91.7)               | 314 (96.6)              | 0.002           | 1.97 (1.08 – 3.59)            |
| CFTR functional class, No (%)                |                            |                            |                         |                 |                               |
| Class I                                      | 342 (8.1)                  | 319 (8.2)                  | 23 (7.1)                | 0.115           | 1.00                          |
| Class II                                     | 3,439 (81.2)               | 3,162 (80.9)               | 277 (85.2)              |                 | 1.19 (0.78 – 1.82)            |
| Class III                                    | 294 (6.9)                  | 273 (7.0)                  | 21 (6.5)                |                 | 0.90 (0.50 – 1.62)            |
| Class IV                                     | 139 (3.3)                  | 135 (3.5)                  | 4 (1.2)                 |                 | 0.41 (0.14 – 1.19)            |
| Class V                                      | 20 (0.5)                   | 20 (0.5)                   | 0 (0)                   |                 | 4.69e <sup>-18</sup> (0 - .)  |
| High risk CFTR genotype, No (%)              | 4,075 (96.2)               | 3,754 (96.0)               | 321 (98.8)              | 0.013           | 3.18 (1.19 – 8.54)            |
| <i>Pseudomonas aeruginosa</i> , No (%)       | 2,621 (61.9)               | 2,343 (59.9)               | 278 (85.5)              | <0.001          | 3.52 (2.59 – 4.80)            |
| <i>Burkholderia cepacia complex</i> , No (%) | 213 (5.0)                  | 153 (3.9)                  | 60 (18.5)               | <0.001          | 3.94 (2.97 – 5.21)            |
| <i>Hemophilus influenzae</i> , No (%)        | 796 (18.8)                 | 749 (19.2)                 | 47 (14.5)               | 0.037           | 0.59 (0.44 – 0.81)            |
| <i>Aspergillus fumigatus</i> , No (%)        | 456 (10.8)                 | 408 (10.4)                 | 48 (14.8)               | 0.015           | 1.61 (1.18 – 2.19)            |
| <i>Staphylococcus aureus</i> , No (%)        | 1,763 (41.6)               | 1,636 (41.9)               | 127 (39.1)              | 0.329           | 0.79 (0.63 – 0.99)            |
| MRSA, No (%)                                 | 68 (1.6)                   | 63 (1.6)                   | 5 (1.5)                 | 0.920           | 1.11 (0.46 – 2.69)            |
| ABPA, No (%)                                 | 262 (6.2)                  | 228 (5.8)                  | 34 (10.5)               | 0.001           | 1.97 (1.38 – 2.81)            |
| Liver disease, No (%)                        | 1,000 (23.6)               | 891 (22.8)                 | 109 (33.5)              | <0.001          | 1.79 (1.42 – 2.26)            |
| Nutritional supplementation, No (%)          | 1,952 (46.1)               | 1,715 (43.9)               | 237 (72.9)              | <0.001          | 2.96 (2.32 – 3.78)            |
| Use of corticosteroid, No (%)                | 2,372 (56.0)               | 2,127 (54.4)               | 245 (75.4)              | <0.001          | 2.56 (1.99 – 3.30)            |
| Organ transplantation, No (%)                | 114 (2.7)                  | 90 (2.3)                   | 24 (7.4)                | <0.001          | 4.43 (2.79 – 6.42)            |
| CF detected by screening, No (%)             | 436 (10.3)                 | 420 (10.7)                 | 16 (4.9)                | 0.001           | 0.42 (0.22 – 0.80)            |

\* *p* values represent difference between individuals who died and those who were alive using t-tests or Kruskal-Wallis tests for normally or non-normally distributed continuous variables and  $\chi^2$  tests for categorical variables.

<sup>†</sup> comparisons are for each year older, for 1 unit increase in BMI or BMI z-score, for 1% increase in %predicted FEV<sub>1</sub> and FVC, high vs. low risk CFTR, CFTR class II,III,IV&V vs. class I, and Yes vs. No for other binary variables.

**Online Appendix Table 2. Population attributable fraction (PAF) of risk factors for CF mortality (n = 4,234)**

| <b>Factor</b>               | <b>reference</b> | <b>HR*</b> | <b>95% CI</b> |      | <b>prevalence<sup>†</sup></b> | <b>PAF</b> | <b>95%CI</b> |      |
|-----------------------------|------------------|------------|---------------|------|-------------------------------|------------|--------------|------|
| Diabetes                    | no diabetes      | 1.62       | 1.27          | 2.06 | 0.37                          | 0.14       | 0.08         | 0.19 |
| %FEV <sub>1</sub> predicted | >= 70%           | 6.14       | 3.86          | 9.77 | 0.94                          | 0.78       | 0.69         | 0.84 |
| BMI z-score                 | > -0.23          | 1.92       | 1.43          | 2.58 | 0.81                          | 0.39       | 0.24         | 0.50 |
| <i>B. cepaciae</i>          | No               | 2.50       | 1.88          | 3.32 | 0.18                          | 0.11       | 0.09         | 0.13 |
| <i>S. aureus</i>            | Yes              | 1.34       | 1.06          | 1.68 | 0.39                          | 0.10       | 0.02         | 0.16 |
| Liver disease               | No               | 1.27       | 1.00          | 1.62 | 0.34                          | 0.07       | 0.00         | 0.13 |
| Corticosteroid use          | No               | 1.73       | 1.33          | 2.24 | 0.75                          | 0.32       | 0.19         | 0.42 |
| Nutritional supplementation | No               | 1.85       | 1.43          | 2.40 | 0.73                          | 0.34       | 0.22         | 0.42 |
| Organ Transplantation       | No               | 2.41       | 1.57          | 3.70 | 0.07                          | 0.04       | 0.03         | 0.05 |

\* Hazard ratio (HR) adjusted for median age, sex and all risk factors in the table

† prevalence of a risk factor in subjects who died.
